# Supplementary material
Source: PubMed Central journal article supplement (PMC3029698)
Supplement: 1014323108_pnas.1014323108_SI.pdf [file 1014323108_pnas.1014323108_SI.pdf]

# Supporting Information

Sue et al. 10.1073/pnas.1014323108

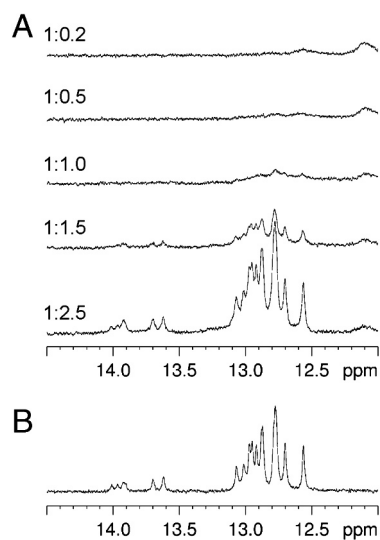

**Fig. S1.** Imino proton NMR spectra of the DNA duplex. (A) One-dimensional  $^1\text{H}$  NMR spectra of solutions containing the indicated molar ratios of DNA added to a 0.12 mM solution of the complex of deuterated p50(39–350)/p65(19–321) with deuterated,  $^{15}\text{N}$ -labeled I $\kappa$ B $\alpha$ (67–287). (B) One-dimensional  $^1\text{H}$  NMR spectrum of the 20-nucleotide DNA duplex free in solution in the absence of protein.
